# Supplementary material for: Diabetes Self-management Education and Support in Type 2 Diabetes: A Joint Position Statement of the American Diabetes Association, the American Association of Diabetes Educators, and the Academy of Nutrition and Dietetics
Source: Oxford University Press journal article supplement (doi:10.2337/dc15-0730), 2015-06-05
Supplement: dc150730-sup-dsmesalgorithmactionsteps.pdf [file dc150730-sup-dsmesalgorithmactionsteps.pdf]

# Diabetes Self-Management Education and Support for Adults with Type 2 Diabetes:

## ALGORITHM ACTION STEPS

Four critical times to assess, provide, and adjust diabetes self-management education and support

| AT DIAGNOSIS                                                                                                                                                                                                                                                                                                                                                                                                                                                                                                                                                                                                                                                                                                                                                                                                                                                                                                                                          | ANNUAL ASSESSMENT OF EDUCATION, NUTRITION, AND EMOTIONAL NEEDS                                                                                                                                                                                                                                                                                                                                                                 | WHEN NEW COMPLICATING FACTORS INFLUENCE SELF-MANAGEMENT                                                                                                                                                                                                                                                                                                                                                                                                                                                                                                 | WHEN TRANSITIONS IN CARE OCCUR                                                                                                                                                                                                                                                                                                                                                                                                                                                                                                                                                                                                                                                                       |
|-------------------------------------------------------------------------------------------------------------------------------------------------------------------------------------------------------------------------------------------------------------------------------------------------------------------------------------------------------------------------------------------------------------------------------------------------------------------------------------------------------------------------------------------------------------------------------------------------------------------------------------------------------------------------------------------------------------------------------------------------------------------------------------------------------------------------------------------------------------------------------------------------------------------------------------------------------|--------------------------------------------------------------------------------------------------------------------------------------------------------------------------------------------------------------------------------------------------------------------------------------------------------------------------------------------------------------------------------------------------------------------------------|---------------------------------------------------------------------------------------------------------------------------------------------------------------------------------------------------------------------------------------------------------------------------------------------------------------------------------------------------------------------------------------------------------------------------------------------------------------------------------------------------------------------------------------------------------|------------------------------------------------------------------------------------------------------------------------------------------------------------------------------------------------------------------------------------------------------------------------------------------------------------------------------------------------------------------------------------------------------------------------------------------------------------------------------------------------------------------------------------------------------------------------------------------------------------------------------------------------------------------------------------------------------|
| PRIMARY CARE PROVIDER/ENDOCRINOLOGIST/CLINICAL CARE TEAM: AREAS OF FOCUS AND ACTION STEPS                                                                                                                                                                                                                                                                                                                                                                                                                                                                                                                                                                                                                                                                                                                                                                                                                                                             |                                                                                                                                                                                                                                                                                                                                                                                                                                |                                                                                                                                                                                                                                                                                                                                                                                                                                                                                                                                                         |                                                                                                                                                                                                                                                                                                                                                                                                                                                                                                                                                                                                                                                                                                      |
| <ul style="list-style-type: none"> <li>□ Answer questions and provide emotional support regarding diagnosis</li> <li>□ Provide overview of treatment and treatment goals</li> <li>□ Teach survival skills to address immediate requirements (safe use of medication, hypoglycemia treatment if needed, introduction of eating guidelines)</li> <li>□ Identify and discuss resources for education and ongoing support</li> <li>□ Make referral for DSME/S and medical nutrition therapy (MNT)</li> </ul>                                                                                                                                                                                                                                                                                                                                                                                                                                              | <ul style="list-style-type: none"> <li>□ Assess all areas of self-management</li> <li>□ Review problem-solving skills</li> <li>□ Identify strengths and challenges of living with diabetes</li> </ul>                                                                                                                                                                                                                          | <ul style="list-style-type: none"> <li>□ Identify presence of factors that affect diabetes self-management and attain treatment and behavioral goals</li> <li>□ Discuss impact of complications and successes with treatment and self-management</li> </ul>                                                                                                                                                                                                                                                                                             | <ul style="list-style-type: none"> <li>□ Develop diabetes transition plan</li> <li>□ Communicate transition plan to new health care team members</li> <li>□ Establish DSME/S regular follow-up care</li> </ul>                                                                                                                                                                                                                                                                                                                                                                                                                                                                                       |
| DIABETES EDUCATION: AREAS OF FOCUS AND ACTION STEPS                                                                                                                                                                                                                                                                                                                                                                                                                                                                                                                                                                                                                                                                                                                                                                                                                                                                                                   |                                                                                                                                                                                                                                                                                                                                                                                                                                |                                                                                                                                                                                                                                                                                                                                                                                                                                                                                                                                                         |                                                                                                                                                                                                                                                                                                                                                                                                                                                                                                                                                                                                                                                                                                      |
| <p>Assess cultural influences, health beliefs, current knowledge, physical limitations, family support, financial status, medical history, literacy, numeracy to determine which content to provide and how:</p> <ul style="list-style-type: none"> <li>□ Medication – choices, action, titration, side effects</li> <li>□ Monitoring blood glucose – when to test, interpreting and using glucose pattern management for feedback</li> <li>□ Physical activity – safety, short-term vs. long-term goals/recommendations</li> <li>□ Preventing, detecting, and treating acute and chronic complications</li> <li>□ Nutrition – food plan, planning meals, purchasing food, preparing meals, portioning food</li> <li>□ Risk reduction – smoking cessation, foot care</li> <li>□ Developing personal strategies to address psychosocial issues and concerns</li> <li>□ Developing personal strategies to promote health and behavior change</li> </ul> | <ul style="list-style-type: none"> <li>□ Review and reinforce treatment goals and self-management needs</li> <li>□ Emphasize preventing complications and promoting quality of life</li> <li>□ Discuss how to adapt diabetes treatment and self-management to new life situations and competing demands</li> <li>□ Support efforts to sustain initial behavior changes and cope with the ongoing burden of diabetes</li> </ul> | <ul style="list-style-type: none"> <li>□ Provide support for the provision of self-care skills in an effort to delay progression of the disease and prevent new complications</li> <li>□ Provide/refer for emotional support for diabetes-related distress and depression</li> <li>□ Develop and support personal strategies for behavior change and healthy coping</li> <li>□ Develop personal strategies to accommodate sensory or physical limitation(s), adapting to new self-management demands, and promote health and behavior change</li> </ul> | <ul style="list-style-type: none"> <li>□ Identify needed adaptations in diabetes self-management</li> <li>□ Provide support for independent self-management skills and self-efficacy</li> <li>□ Identify level of significant other involvement and facilitate education and support</li> <li>□ Assist with facing challenges affecting usual level of activity, ability to function, health benefits and feelings of well-being</li> <li>□ Maximize quality of life and emotional support for the patient (and family members)</li> <li>□ Provide education for others now involved in care</li> <li>□ Establish communication and follow-up plans with the provider, family, and others</li> </ul> |
